# Supplementary material
Source: Springer Nature journal article supplement (https://www.springermedizin.de/resource/supplementary/40345_2013_27_MOESM5_ESM.pdf/25658348)
Supplement: MOESM5 [file 25658348]

**Table 5 – Qualitative findings across participants:**

| Qualitative Finding                                           | Participant Quotes                                                                                                                                  |
|---------------------------------------------------------------|-----------------------------------------------------------------------------------------------------------------------------------------------------|
| I. Emotional impact of TJCT:                                  | It was downright entertaining and moving. 03-HP007                                                                                                  |
| i. Authentic                                                  | Knowing that she’s an actress, but knowing that she actually lived it (...) had an impact.03-HP009                                                  |
| ii. Reliable                                                  | It just was kind of like reading your own journal but through someone else’s eyes. 02-HP006 (HP&CM)                                                 |
| iii. Courageous                                               | The key factors for me would be that she was really fearless about telling her story. 02-CM006                                                      |
| II. TJCT as a unique learning opportunity:                    | I thought it was very helpful just to hear the experience from a person’s perspective who actually was struggling with the disorder. 02-HP010       |
| i. The complexity and heterogeneity of BD experiences         | More specifically that, I'm seeing that there's more levels of disorder than what I've experienced. 01-CM029                                        |
| ii. The possibility and opportunity for recovery (e.g., hope) | That’s powerful, because it gives you an image that people can get better, you know. This is where she was at, and this is how she is now. 02-HP027 |
| iii. A demystification of the experiences of BD               | I think it just reminded me that they’re just like you and me. They’re just a person who has a story. 02-HP006                                      |

CM = person with BD; HP = healthcare provider.
